# Supplementary material for: Intestinal Microbiota Regulate Certain Meat Quality Parameters in Chicken
Source: PubMed Central journal article supplement (PMC9085416; doi:10.3389/fnut.2022.747705), 2022-04-25
Supplement: Data_Sheet_6.pdf [file Data_Sheet_6.pdf]

## SUPPLEMENTARY DATA

**Table S1. Diet composition and nutrition levels**

| Ingredients              | d1-21% | d22-35% |
|--------------------------|--------|---------|
| Corn                     | 55.08  | 61.071  |
| Soybean meal             | 38.321 | 32.716  |
| Plant oil                | 3.113  | 2.886   |
| Calcium bicarbonate      | 1.265  | 1       |
| Stone powder             | 1.362  | 1.35    |
| NaCl                     | 0.25   | 0.25    |
| Microelement premix*     | 0.2    | 0.2     |
| Vitamin premix**         | 0.03   | 0.03    |
| DL-methionine            | 0.184  | 0.188   |
| L-lysine hydrochloride   | 0.06   | 0.015   |
| Choline chloride         | 0.1    | 0.174   |
| Phytase(5000D)           | 0.015  | 0.1     |
| Santoquin                | 0.02   | 0.02    |
| Total                    | 100    | 100     |
| Nutrient Level***        |        |         |
| MC kj/kg                 | 2.95   | 2.99    |
| CP g/kg                  | 21.4   | 19.5    |
| Lys g/kg                 | 1.2    | 1.15    |
| Met g/kg                 | 0.49   | 0.47    |
| Ca g/kg                  | 0.95   | 0.9     |
| Available phosphors g/kg | 0.45   | 0.4     |

\*Microelement remix provides following per kg diet: Cu, 8mg (CuSO<sub>4</sub>·5H<sub>2</sub>O); Fe, 80mg (FeSO<sub>4</sub>); Mn, 100mg (MnSO<sub>4</sub>·H<sub>2</sub>O); Se, 0.15mg (Na<sub>2</sub>SeO<sub>3</sub>); I, 0.35mg (KI). \*\*Vitamin premix provides following per kg diet: VA, 9500IU; VD<sub>3</sub>, 62.5ug; VE, 30IU; VK<sub>3</sub>, 2.65mg; VB<sub>1</sub>, 2mg; VB<sub>6</sub>, 2mg; VB<sub>12</sub>, 0.025mg; Biotin, 0.0325mg; Folic Acid, 1.25mg; Pantothenic Acid, 12mg; Nicotinic Acid, 50mg. \*\*\*Nutrient Level: Calculated according to NRC(1994).

Table S2 Statistical result of correlation analysis between difference microbiota and phenotypes (p-value)

|                               | body weight | abdominal fat rate | drip losing | MyoD1 | Diameter |
|-------------------------------|-------------|--------------------|-------------|-------|----------|
| Butyricoccus                  | 0.055       | 0.148              | 0.223       | 0.040 | 0.004    |
| Oscillibacter                 | 0.043       | 0.182              | 0.008       | 0.202 | 0.000    |
| Tyzzarella                    | 0.273       | 0.719              | 0.182       | 0.249 | 0.433    |
| Prevotellaceae_UCG-001        | 0.004       | 0.166              | 0.216       | 0.055 | 0.006    |
| Faecalicoccus                 | 0.027       | 0.075              | 0.291       | 0.007 | 0.015    |
| Erysipelatoclostridium        | 0.032       | 0.024              | 0.207       | 0.055 | 0.070    |
| Family_XIII_UCG-001           | 0.177       | 0.035              | 0.177       | 0.145 | 0.060    |
| Lachnospiraceae_UCG-010       | 0.143       | 0.298              | 0.051       | 0.059 | 0.081    |
| Enorma                        | 0.027       | 0.575              | 0.056       | 0.418 | 0.070    |
| Butyricimonas                 | 0.001       | 0.074              | 0.064       | 0.105 | 0.006    |
| Ruminococcaceae_UCG-005       | 0.023       | 0.842              | 0.432       | 0.337 | 0.016    |
| Akkermansia                   | 0.048       | 0.343              | 0.100       | 0.171 | 0.004    |
| Lachnoclostridium             | 0.017       | 0.037              | 0.057       | 0.081 | 0.034    |
| Anaerotruncus                 | 0.003       | 0.426              | 0.277       | 0.108 | 0.004    |
| Ruminococcaceae_UCG-007       | 0.280       | 0.220              | 0.020       | 0.701 | 0.063    |
| Ruminococcaceae_NK4A214_group | 0.001       | 0.189              | 0.109       | 0.067 | 0.000    |
| Christensenellaceae_R-7_group | 0.018       | 0.034              | 0.143       | 0.351 | 0.029    |
| Campylobacter                 | 0.088       | 0.943              | 0.193       | 0.668 | 0.092    |
| Faecalitalea                  | 0.002       | 0.100              | 0.501       | 0.011 | 0.004    |
| Slackia                       | 0.106       | 0.020              | 0.134       | 0.083 | 0.181    |
| Ruminiclostridium_9           | 0.006       | 0.178              | 0.159       | 0.419 | 0.004    |
| Bacteroides                   | 0.055       | 0.483              | 0.243       | 0.178 | 0.000    |
| Ruminococcaceae_UCG-013       | 0.054       | 0.955              | 0.539       | 0.643 | 0.074    |
| Eubacterium_brachy_group      | 0.015       | 0.292              | 0.015       | 0.566 | 0.069    |
| Ruminococcus_torques_group    | 0.002       | 0.621              | 0.342       | 0.228 | 0.019    |

Table S3. Correlation analysis of drip losing rate and cecum microbiota (top 20 except for uncluster, unidentify, others)

|                            | breast muscle     |         | biceps femoris muscle |          |
|----------------------------|-------------------|---------|-----------------------|----------|
|                            | Correlation value | P-value | Correlation value     | P-value  |
| Alistipes                  | -0.170401972      | 0.59647 | 0.563682067           | 0.056296 |
| Faecalibacterium           | -0.009634092      | 0.97629 | -0.152937204          | 0.635124 |
| Ruminococcus_torques_group | -0.15195048       | 0.63733 | -0.338450081          | 0.281891 |
| Bacteroides                | -0.033505494      | 0.91767 | 0.036045746           | 0.911447 |
| Barnesiella                | 0.227777152       | 0.47646 | -0.035532052          | 0.912705 |
| Ruminococcaceae_group_004  | 0.009485796       | 0.97666 | -0.078942356          | 0.807333 |
| Anaerotruncus              | -0.167984197      | 0.60177 | -0.009496264          | 0.976633 |
| Lactobacillus              | 0.009864106       | 0.97573 | -0.227056147          | 0.4779   |
| Lachnospirillum            | -0.321680701      | 0.30791 | -0.061676258          | 0.848986 |
| Eisenbergiella             | -0.485988575      | 0.10918 | 0.136798658           | 0.671607 |
| Subdoligranulum            | -0.045108795      | 0.88929 | -0.11867173           | 0.713371 |
| Streptococcus              | 0.031389765       | 0.92285 | 0.231876464           | 0.468345 |
| Butyrivibrio               | 0.196370595       | 0.54074 | -0.404842798          | 0.191738 |
| Ruminococcaceae_group_005  | 0.024293425       | 0.94026 | -0.112127693          | 0.728634 |
| Flavonifractor             | -0.338661115      | 0.28157 | 0.268252829           | 0.399222 |
| Coprococcus1               | 0.221934751       | 0.48815 | -0.277575591          | 0.382389 |
| Oscillibacter              | -0.099132145      | 0.75921 | -0.357251049          | 0.254271 |

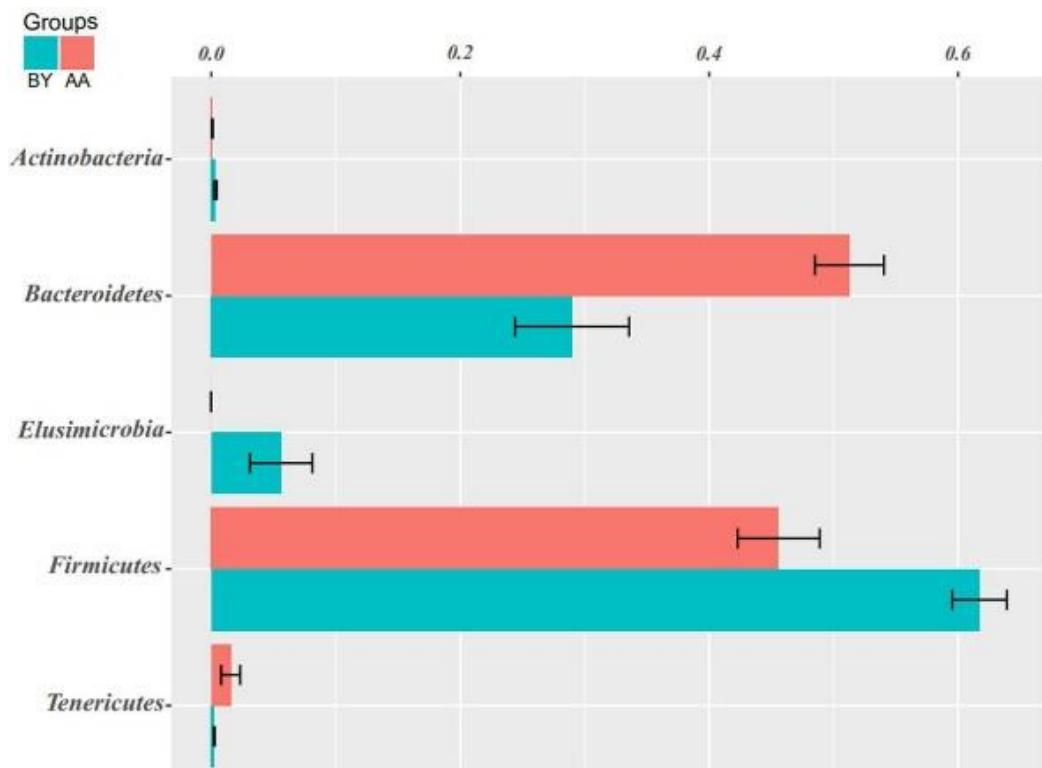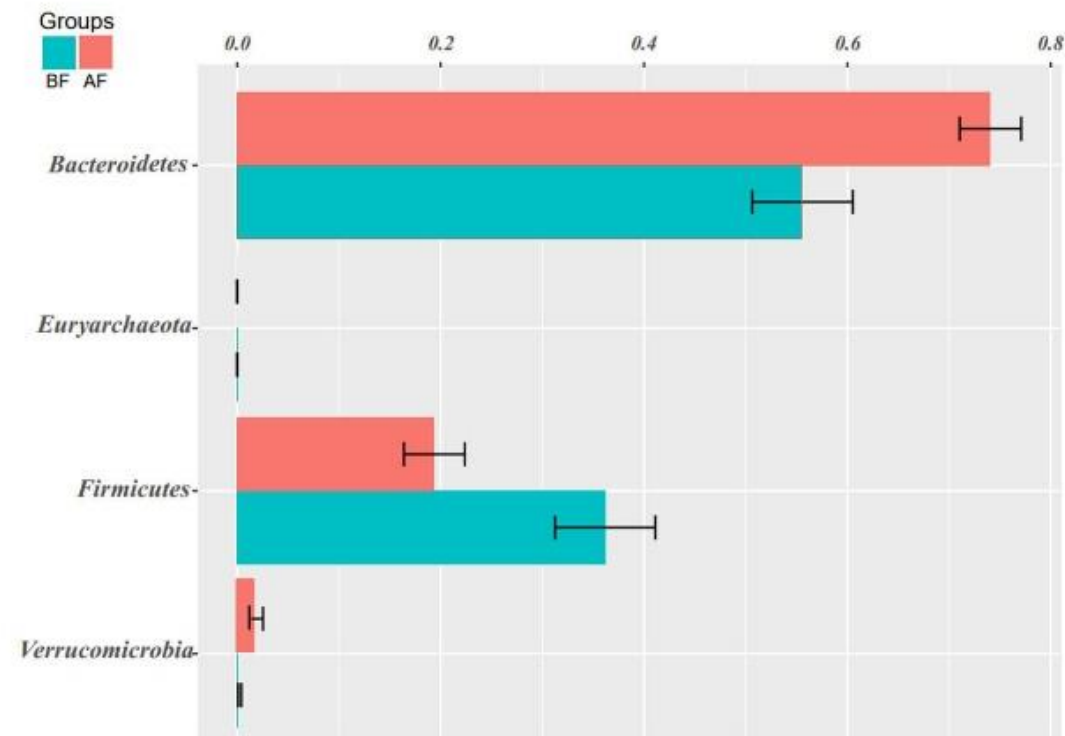

**Figure S1** The relative abundance of different cecum intestinal bacteria (phylum level) in donators and recipients

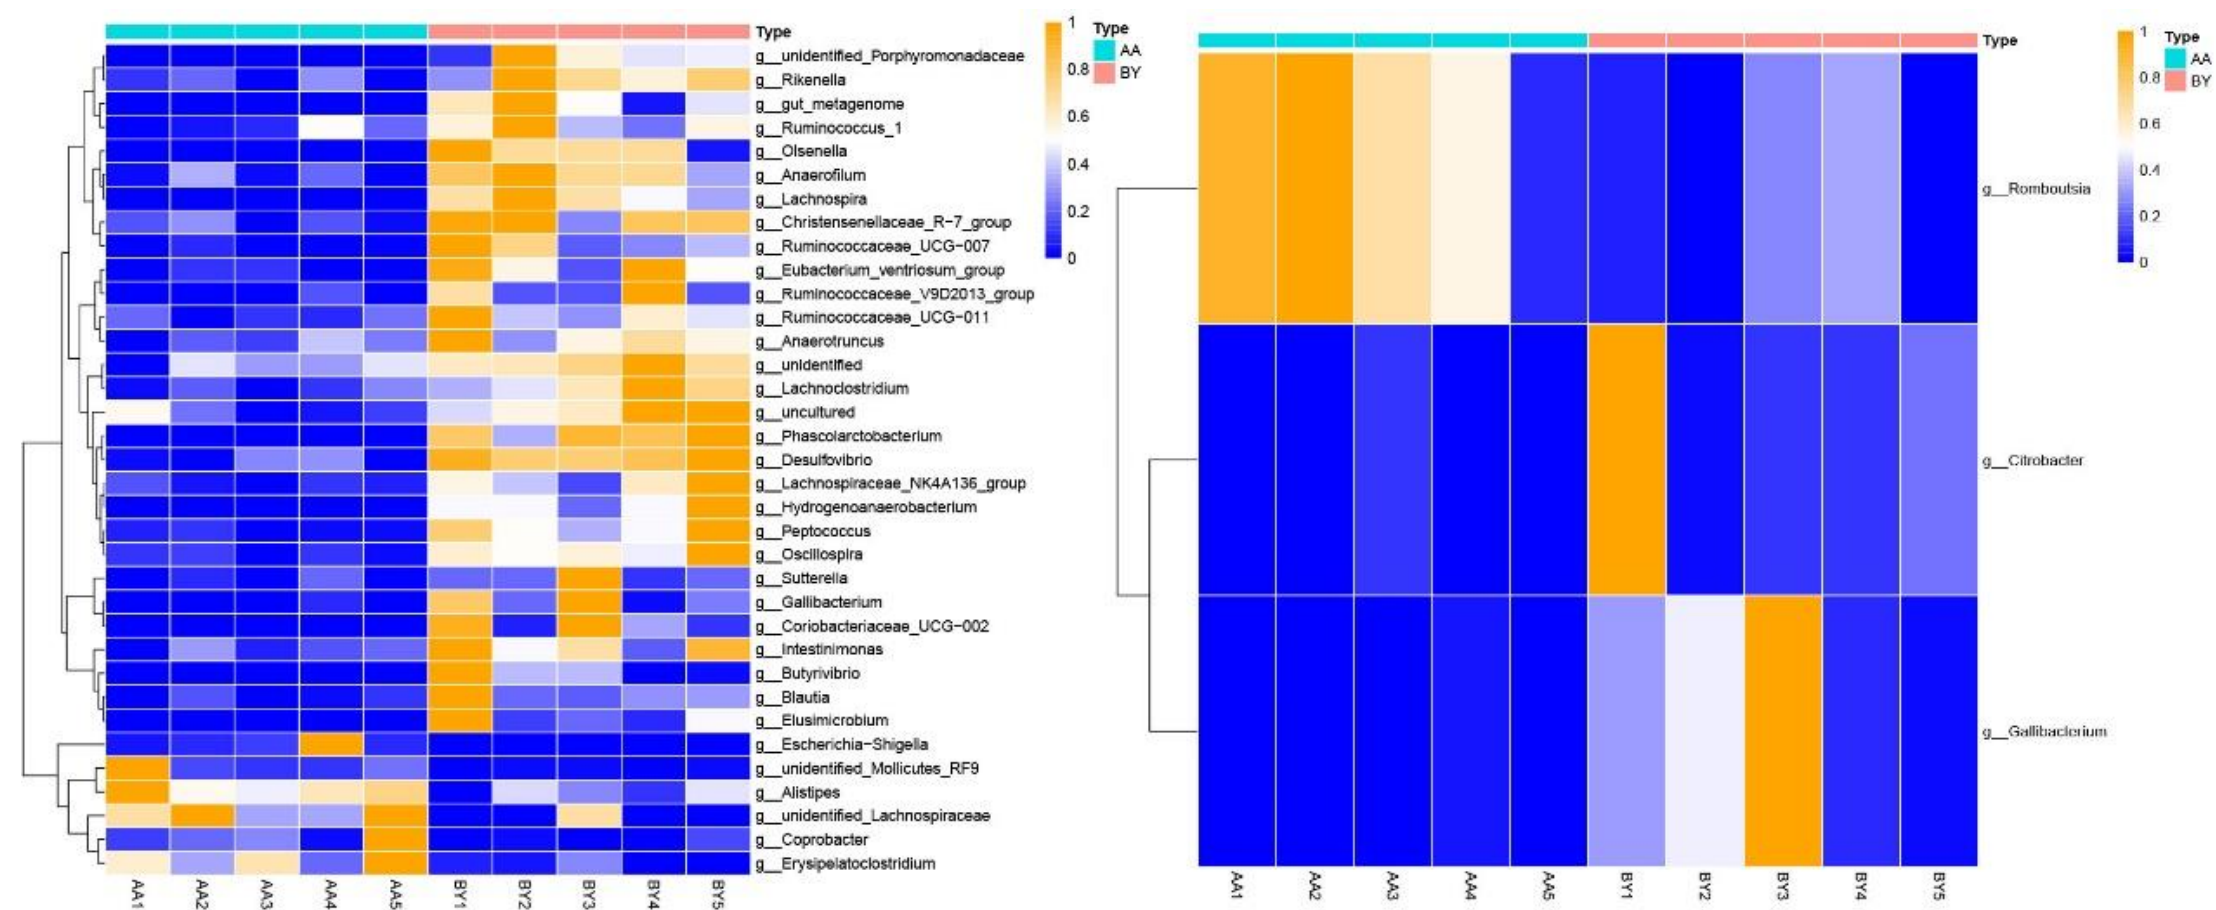

Figure S2 Relative abundance of different microbiota in cecum (left) and ileum (right) of donators

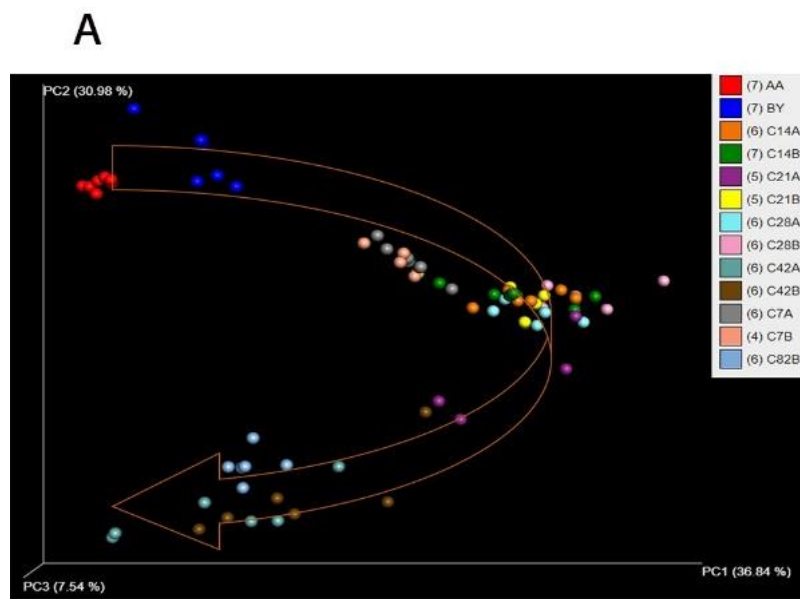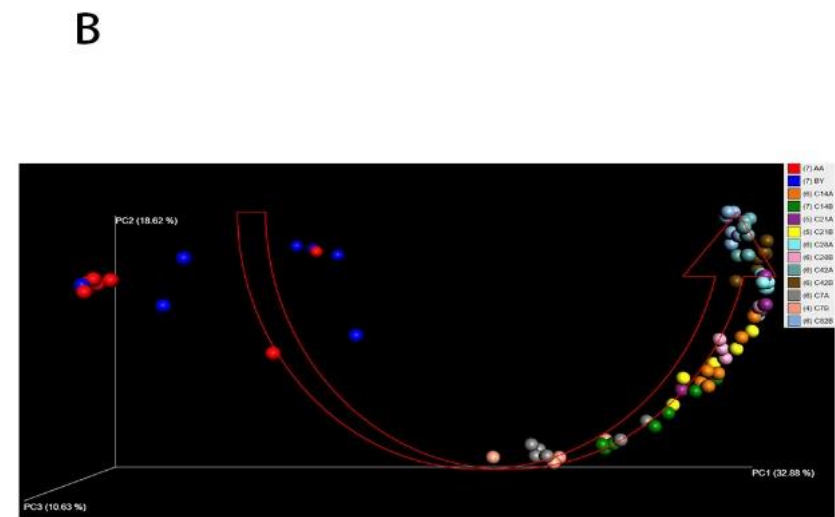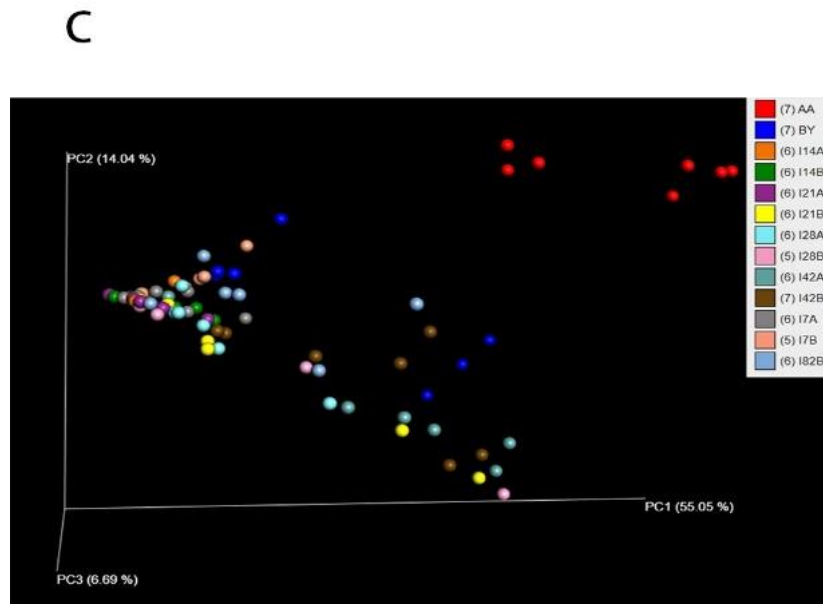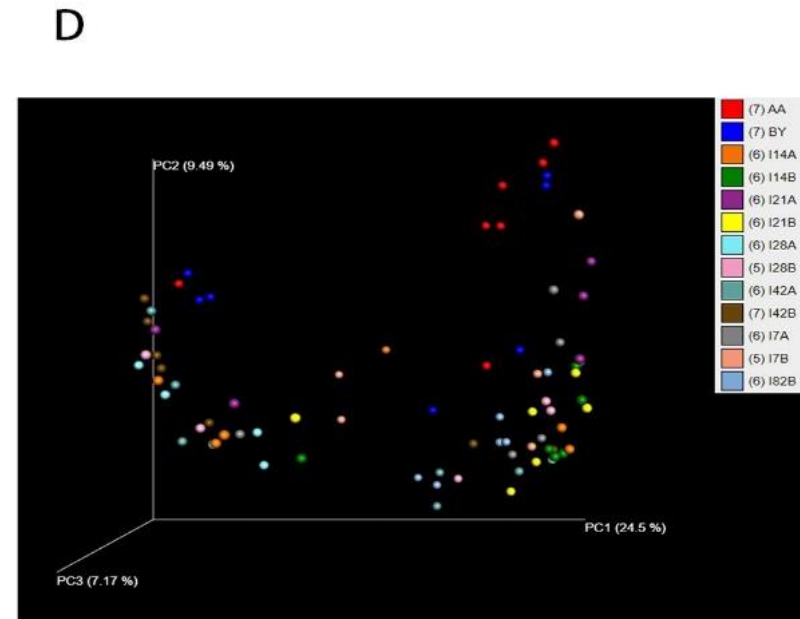

Figure S3 Develop regularity of intestinal microbiota according to analysis of PCOA. (A) PCOA of weighted unifrac distance in cecum. (B) PCOA of unweighted unifrac distance in cecum. (C) PCOA of weighted unifrac distance in ileum. (D) PCOA of unweighted unifrac distance in ileum.
